# Supplementary material for: Engineering SARS-CoV-2 specific cocktail antibodies into a bispecific format improves neutralizing potency and breadth
Source: PubMed Central journal article supplement (PMC9499943; doi:10.1038/s41467-022-33284-y), 2022-09-22
Supplement: 41467_2022_33284_MOESM1_ESM.pdf [file 41467_2022_33284_MOESM1_ESM.pdf]

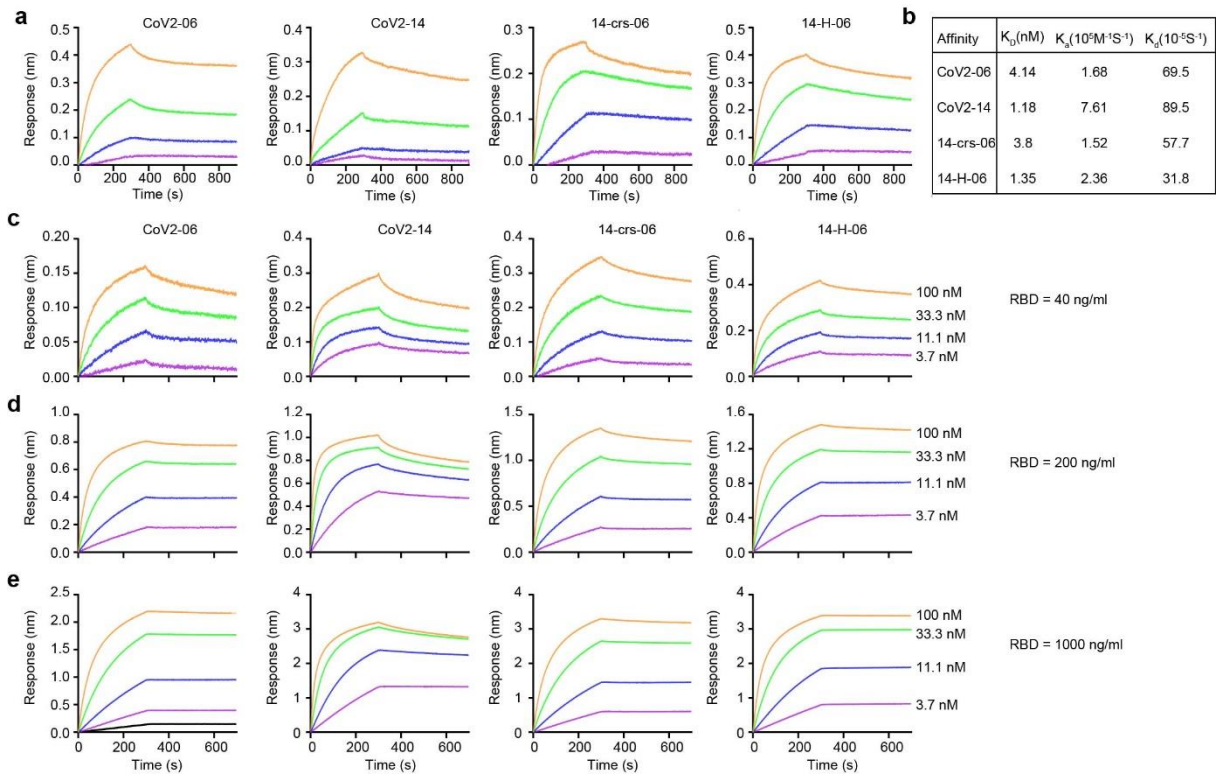

**Supplementary Fig. 1. Kinetic bindings of the BLI-based affinity and avidity assays. a,** The sensorgrams of affinity binding for indicated antibodies. Antibodies were immobilized onto the protein A biosensors and the RBD-His was in solutions. **b,** Summary of the affinity binding ( $K_D$ ), the association ( $K_{on}$ ) and the dissociation ( $K_{dis}$ ) parameters. **c-e,** The sensorgrams in the avidity binding for indicated antibodies. The RBD-His was immobilized onto the Ni-NTA biosensors at concentrations of 40 ng/ml (**c**), 200 ng/ml (**d**) and 1000 ng/ml (**e**) and indicated antibodies were in solutions.

Fab14 + RBD complex data collection at Titan Krios 300 keV with K2 camera

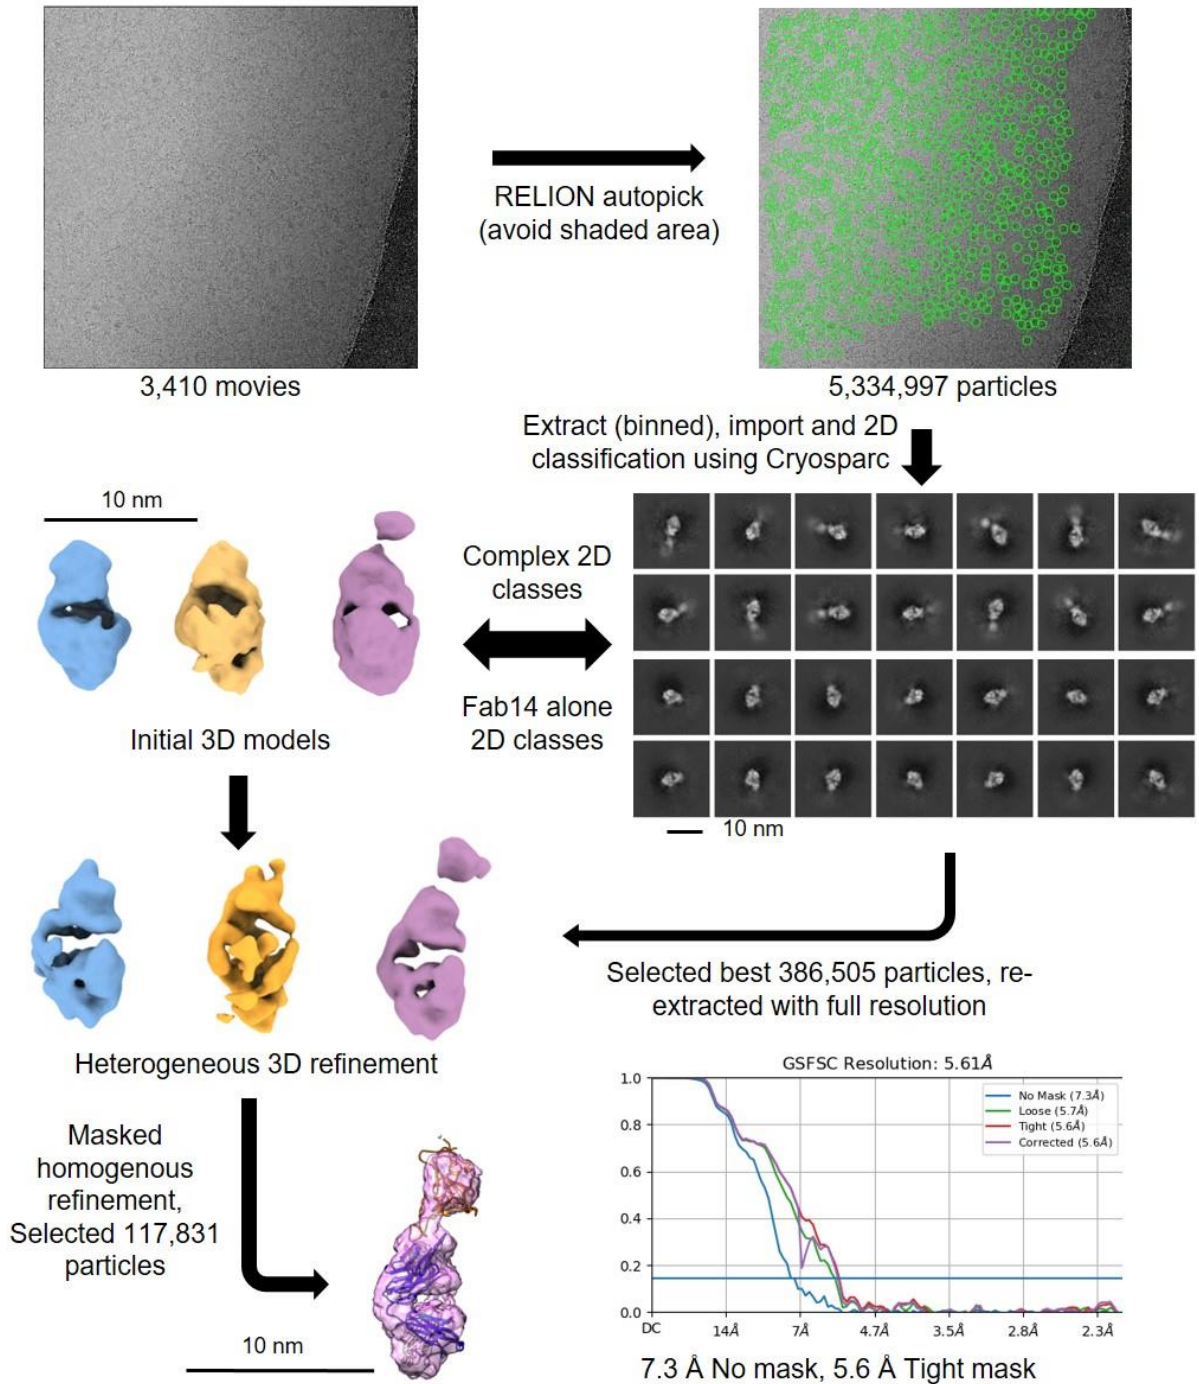

**Supplementary Fig. 2. Fab14+RBD complex cryo-EM data processing workflow.**

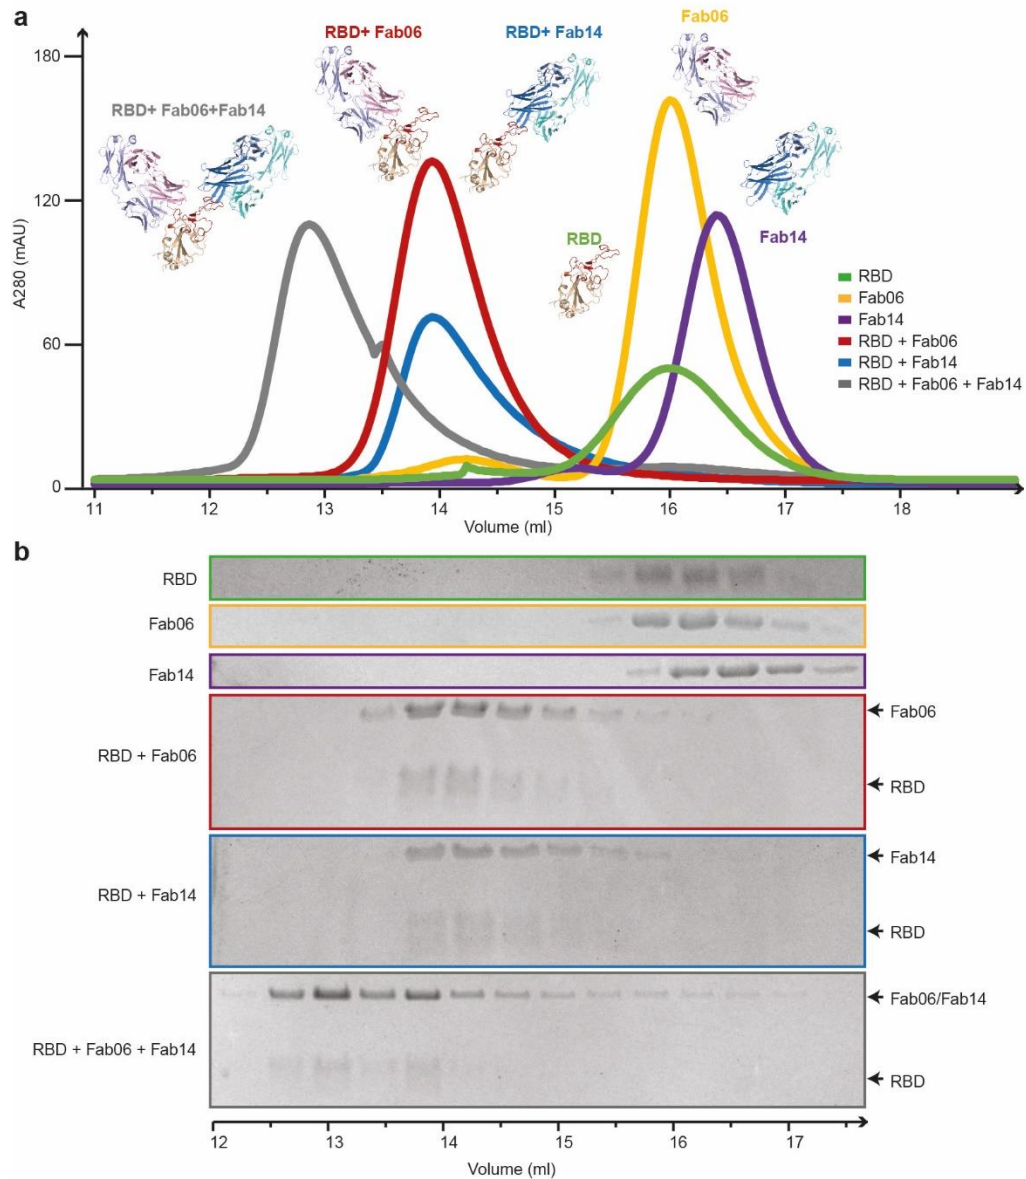

**Supplementary Fig. 3.** Complex formation between RBD, Fab06, and Fab14. **(a)** The size-exclusion chromatography (SEC) analysis of indicated Fab, RBD and Fab/RBD complexes. **(b)** The non-reducing SDS-PAGE analysis of the fractions collected from the SEC analysis. The image is from one experiment.

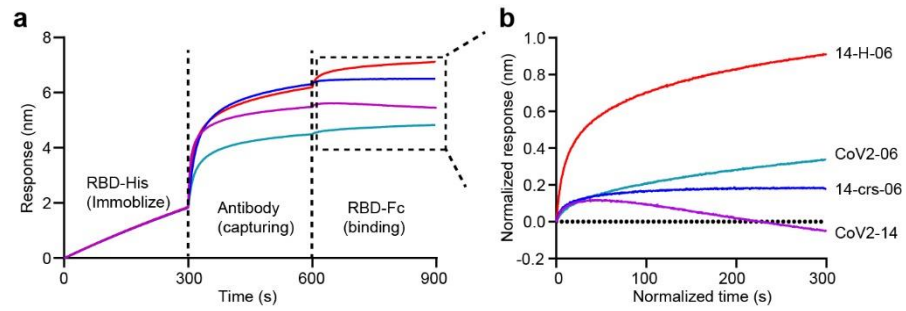

**Supplementary Fig. 4. Multivalent binding to RBD by 14-H-06.** Simultaneous binding of antibodies to multiple RBDs was determined by a BLI sandwich assay. **a**, The sensorgrams showing the immobilization of RBD-His for 300s, the capturing of indicated antibodies for 300s and the following binding by RBD-Fc for 300s. The binding to RBD-Fc shown in the dashed box was normalized and shown in the panel **b**.

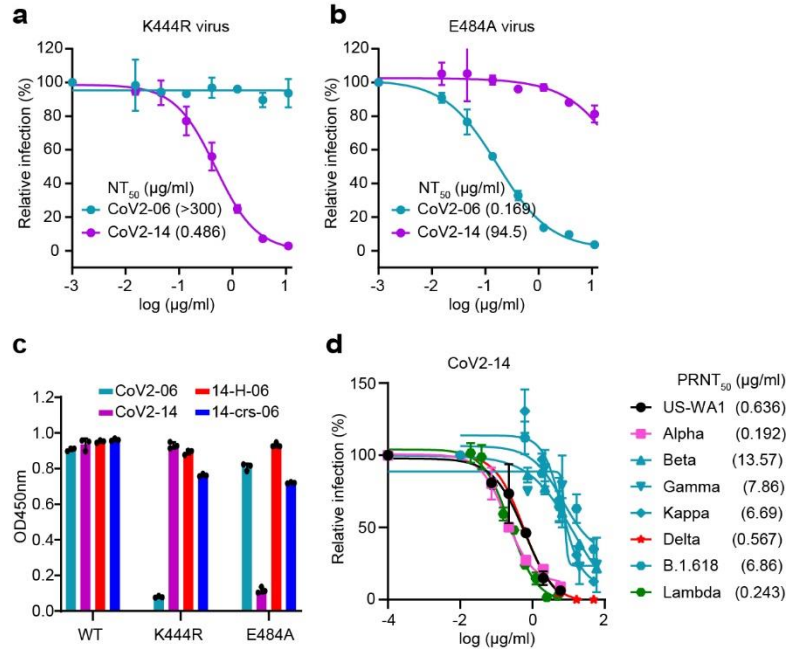

**Supplementary Fig. 5. Additional binding and neutralizing characterizations of antibody against the variants.** (a-b) Neutralizations of SARS-CoV-2 virus with K444R mutation (a) and E484A mutation (b) by CoV2-06 and CoV2-14. The assay is based on the mNeonGreen reporter virus and the NT<sub>50</sub> values are labeled. c, ELISA binding to the WT RBD and the K444R and E484A RBD mutants by indicated antibodies. d, PRNT of CoV2-14 against the SARS-CoV-2 US-WA1 strain and indicated SARS-CoV-2 variants. The PRNT<sub>50</sub> values are labeled. Data are from two replicates for a, b and d and from three replicates for c.

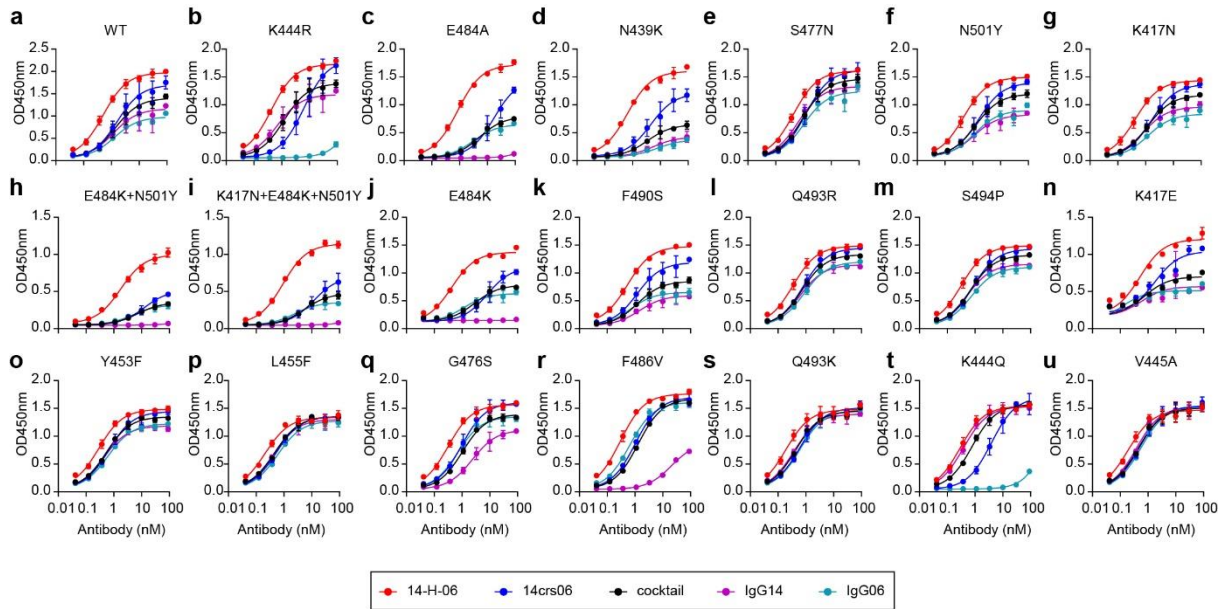

**Supplementary Fig. 6. ELISA bindings of bsAbs, individual antibodies and the cocktail to wild type and mutant RBDs.** a-u, ELISA titrations of indicated antibodies to immobilized WT RBD and RBD mutants. Data points are from duplicate wells.

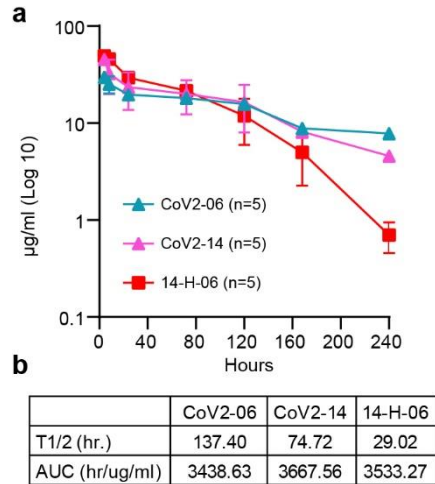

**Supplementary Fig. 7. Antibody pharmacokinetics in mice.** **a**, The serum concentrations of injected antibodies at multiple time points (4, 8, 24, and 72 hours 5, 7, 10 days) post injection were quantified by ELISA. **b**, Pharmacokinetics parameters were calculated by non-compartmental analysis using Phoe<sup>ni</sup>x 64 WinNonlin (8.3.3.33) software (Certara).

**Table S1. Data collection and refinement statistics for crystal structures**

|                                   | <b>Fab06-RBD Complex</b>          | <b>Fab14</b>                |
|-----------------------------------|-----------------------------------|-----------------------------|
| Wavelength (Å)                    | 0.9464                            | 0.9464                      |
| Resolution range (Å) <sup>a</sup> | 47.55 - 2.89 (2.993 - 2.89)       | 48.03 - 2.46 (2.548 - 2.46) |
| Space group                       | P 2 <sub>1</sub> 2 <sub>1</sub> 2 | C2                          |
| Unit cell a,b,c (Å)               | 50.17, 266.35, 112.61             | 77.7, 71.22, 96.76          |
| $\alpha,\beta,\gamma$ (°)         | 90, 90, 90                        | 90, 99.07, 90               |
| Total reflections                 | 363812 (35178)                    | 130818 (11319)              |
| Unique reflections                | 34882 (3389)                      | 18867 (1696)                |
| Multiplicity                      | 10.4 (10.4)                       | 6.9 (6.7)                   |
| Completeness (%)                  | 99.81 (98.86)                     | 98.83 (89.35)               |
| Mean I/sigma(I)                   | 8.31 (1.08)                       | 13.60 (1.81)                |
| Wilson B-factor                   | 63.19                             | 53.73                       |
| R <sub>merge</sub>                | 0.3153 (2.504)                    | 0.1281 (1.076)              |
| R <sub>meas</sub>                 | 0.3316 (2.632)                    | 0.1385 (1.165)              |
| R <sub>pim</sub>                  | 0.1006 (0.7924)                   | 0.05213 (0.4418)            |
| CC <sub>1/2</sub>                 | 0.994 (0.48)                      | 0.997 (0.765)               |
| CC*                               | 0.998 (0.806)                     | 0.999 (0.931)               |
| Reflections used in refinement    | 34874 (3388)                      | 18855 (1694)                |
| Reflections used for R-free       | 1743 (170)                        | 943 (85)                    |
| R <sub>work</sub> <sup>b</sup>    | 0.2287 (0.3623)                   | 0.2104 (0.3511)             |
| R <sub>free</sub> <sup>b</sup>    | 0.2694 (0.4140)                   | 0.2563 (0.3683)             |
| CC <sub>(work)</sub>              | 0.938 (0.656)                     | 0.948 (0.795)               |
| CC <sub>(free)</sub>              | 0.888 (0.374)                     | 0.907 (0.788)               |
| Number of non-hydrogen atoms      | 9536                              | 3384                        |
| protein                           | 9411                              | 3310                        |
| NAG                               | 28                                |                             |
| water                             | 97                                | 74                          |
| Protein residues                  | 1242                              | 438                         |
| RMS(bonds) (Å)                    | 0.012                             | 0.010                       |
| RMS(angles) (°)                   | 1.55                              | 1.27                        |
| Ramachandran favored (%)          | 95.43                             | 95.39                       |
| Ramachandran allowed (%)          | 4.57                              | 4.61                        |
| Ramachandran outliers (%)         | 0.00                              | 0.00                        |
| Rotamer outliers (%)              | 0.66                              | 0.00                        |
| Clashscore                        | 13.06                             | 8.74                        |
| Average B-factor                  | 67.21                             | 57.01                       |
| protein                           | 67.34                             | 57.00                       |
| water                             | 49.33                             | 57.17                       |



**Table S2. Engineered mutations in the spike region of recombinant SARS-CoV-2 variants.**

| <b>Variants</b>        | <b>Spike mutations</b>                                                                                                                                                                                                                                |
|------------------------|-------------------------------------------------------------------------------------------------------------------------------------------------------------------------------------------------------------------------------------------------------|
| Alpha<br>(B.1.1.7)     | Δ69-70, Δ145, N501Y, A570D, D614G, P681H, T716I, S982A, and D1118H                                                                                                                                                                                    |
| Beta<br>(B.1.351)      | D80A, D215G, Δ242-244, K417N, E484K, N501Y, D614G, and A701V                                                                                                                                                                                          |
| Gamma<br>(P.1)         | L18F, T20N, P26S, D138Y, R190S, K417T, E484K, N501Y, D614G, H655Y, T1027I, and V1176F                                                                                                                                                                 |
| Kappa<br>(B.1.617.1)   | G142D, E154K, L452R, E484Q, D614G, P681R, Q1071H, and H1101D                                                                                                                                                                                          |
| Delta<br>(B.1.617.2)   | T19R, G142D, L452R, T478K, D614G, P681R, and D950N                                                                                                                                                                                                    |
| Lambda                 | G75V, T76I, Δ246-252, D253N, L452Q, F490S, D614G, and T859N                                                                                                                                                                                           |
| B.1.618                | H49Y, Δ145-146, E484K, and D614G                                                                                                                                                                                                                      |
| Omicron<br>(B.1.1.529) | A67V, del69-70, T95I, Δ142-144, Y145D, del211, L212I, ins214EPE, G339D, S371L, S373P, S375F, K417N, N440K, G446S, S477N, T478K, E484A, Q493R, G496S, Q498R, N501Y, Y505H, T547K, D614G, H655Y, N679K, P681H, N764K, D796Y, N856K, Q954H, N969K, L981F |
